# Supplementary material for: Determining Future Aflatoxin Contamination Risk Scenarios for Corn in Southern Georgia, USA using Spatio-temporal Modelling and Future Climate Simulations
Source: Research Square preprint supplement (doi:10.21203/rs.3.rs-152995/v1), 2021-01-29
Supplement: Supplementary file 1 [file 1dbbc04eab1efbf35bc00855.docx]

## Table 1. Number of counties with different percentages of years with 2 weather risk factor thresholds exceeded under the RCP 4.5 scenario

|  | Number of counties | | | | | | | |
| --- | --- | --- | --- | --- | --- | --- | --- | --- |
| % of years with 2 risk factors | 2000-2030 | 2010-2040 | 2020-2050 | 2030-2060 | 2040-2070 | 2050-2080 | 2060-2090 | 2070-2100 |
| 0-20 | 35 | 28 | 25 | 26 | 25 | 29 | 31 | 30 |
| 20-40 | 42* | 26 | 25 | 22 | 31 | 29 | 25 | 24 |
| 40-60 | 34 | 41* | 41* | 35 | 33 | 44* | 40* | 33 |
| 60-80 | 17 | 31 | 32 | 42* | 39* | 26 | 32 | 39* |
| 80-100 | 0 | 2 | 5 | 3 | 0 | 0 | 0 | 2 |

*Dominant proportion of years with 2 risk factors for 30-year period

## Table 2. Number of counties with different percentages of years with 2 weather risk factor thresholds exceeded under the RCP 8.5 scenario

|  | Number of counties | | | | | | | |
| --- | --- | --- | --- | --- | --- | --- | --- | --- |
| % of years with 2 risk factors | 2000-2030 | 2010-2040 | 2020-2050 | 2030-2060 | 2040-2070 | 2050-2080 | 2060-2090 | 2070-2100 |
| 0-20 | 41* | 31 | 21 | 19 | 27 | 27 | 14 | 3 |
| 20-40 | 24 | 20 | 23 | 29 | 28 | 28 | 28 | 15 |
| 40-60 | 33 | 28 | 22 | 21 | 38* | 32 | 46* | 29 |
| 60-80 | 28 | 46* | 59* | 58* | 35 | 39* | 39 | 51* |
| 80-100 | 2 | 3 | 3 | 1 | 0 | 1 | 1 | 30 |
